# Supplementary material
Source: PubMed Central journal article supplement (PMC7506943)
Supplement: cb0c00564_si_001.pdf [file cb0c00564_si_001.pdf]

1 **Supporting information for:**  
2 **Functional and structural insights into a novel promiscuous ketoreductase of the**  
3 **lugdunomycin biosynthetic pathway**

4 Xiansha Xiao<sup>a</sup>, Somayah S. Elsayed<sup>a</sup>, Changsheng Wu<sup>b</sup>, Helga U. van der Heul<sup>a</sup>, Mikko Metsä-  
5 Ketelä<sup>c</sup>, Chao Du<sup>a</sup>, Andrea E. Prota<sup>d</sup>, Chun-Chi Chen<sup>e</sup>, Weidong Liu<sup>e</sup>, Rey-Ting Guo<sup>e</sup>, Jan Pieter  
6 Abrahams<sup>a,f,g</sup> and Gilles P. van Wezel<sup>a\*</sup>

7 <sup>a</sup> Molecular Biotechnology, Leiden University, PO Box 9505, 2300RA Leiden, The Netherlands

8 <sup>b</sup> State Key Laboratory of Microbial Technology, Institute of Microbial Technology, Shandong  
9 University, Qingdao 266237, P. R. China

10 <sup>c</sup> Department of Biochemistry and Food Chemistry, University of Turku, FIN-20014 Turku,  
11 Finland

12 <sup>d</sup> Laboratory of Biomolecular Research, Division of Biology and Chemistry, Paul Scherrer  
13 Institut, CH-5232 Villigen, Switzerland

14 <sup>e</sup> State Key Laboratory of Biocatalysis and Enzyme Engineering, School of Life Sciences, Hubei  
15 University, Wuhan 43420, P. R. China

16 <sup>f</sup> Bio-nano diffraction Biozentrum, Paul Scherrer Institut, CH-5232 Villigen, Switzerland

17 <sup>g</sup> Biozentrum, University of Basel, Mattenstrasse 26, CH-4058 Basel, Switzerland

18 \* Correspondence: [g.wezel@biology.leidenuniv.nl](mailto:g.wezel@biology.leidenuniv.nl).

|    |                                                                              |                          |
|----|------------------------------------------------------------------------------|--------------------------|
| 19 |                                                                              |                          |
|    |                                                                              | <b>TABLE OF CONTENTS</b> |
| 20 | <b>SUPPLEMENTAL METHODS</b>                                                  | <b>3</b>                 |
| 21 | Bacterial strains and culture conditions                                     | 3                        |
| 22 | Metabolite extraction, isolation and characterization                        | 3                        |
| 23 | LC-MS/MS peptide identification                                              | 4                        |
| 24 | LC-MS analysis of metabolites                                                | 5                        |
| 25 | <b>SUPPLEMENTAL FIGURES</b>                                                  | <b>7</b>                 |
| 26 | Figure S1                                                                    | 7                        |
| 27 | Figure S2                                                                    | 7                        |
| 28 | Figure S3                                                                    | 8                        |
| 29 | Figure S4                                                                    | 8                        |
| 30 | Figure S5                                                                    | 9                        |
| 31 | Figure S6                                                                    | 10                       |
| 32 | Figure S7                                                                    | 11                       |
| 33 | <b>Supplemental Data</b>                                                     | <b>12</b>                |
| 34 | Scheme S1                                                                    | 12                       |
| 35 | Data S1                                                                      | 13                       |
| 36 | <b>Data S2. Spectroscopic data of compound 7</b>                             | <b>14</b>                |
| 37 | <sup>1</sup> H NMR spectrum of 7 in CDCl <sub>3</sub> (600 MHz, 298 K)       | 14                       |
| 38 | COSY spectrum of 7 in CDCl <sub>3</sub> (600 MHz, 298 K)                     | 14                       |
| 39 | Multiplicity-edited HSQC spectrum of 7 in CDCl <sub>3</sub> (600 MHz, 298 K) | 15                       |
| 40 | HMBC spectrum of 7 in CDCl <sub>3</sub> (600 MHz, 298 K)                     | 15                       |
| 41 | (+)-HR-ESI-MS spectrum of 7                                                  | 16                       |
| 42 | UV spectrum of 7                                                             | 16                       |
| 43 | <b>Data S3. Spectroscopic data of compound 8</b>                             | <b>17</b>                |
| 44 | <sup>1</sup> H NMR spectrum of 8 in CDCl <sub>3</sub> (600 MHz, 298 K)       | 17                       |
| 45 | COSY spectrum of 8 in CDCl <sub>3</sub> (600 MHz, 298 K)                     | 17                       |
| 46 | Multiplicity-edited HSQC spectrum of 8 in CDCl <sub>3</sub> (600 MHz, 298 K) | 18                       |
| 47 | HMBC spectrum of 8 in CDCl <sub>3</sub> (600 MHz, 298 K)                     | 18                       |
| 48 | (+)-HR-ESI-MS spectrum of 8                                                  | 19                       |
| 49 | UV spectrum of 8                                                             | 19                       |
| 50 | <b>SUPPLEMENTAL TABLES</b>                                                   | <b>20</b>                |
| 51 | Table S1                                                                     | 20                       |
| 52 | Table S2                                                                     | 20                       |
| 53 | Table S3                                                                     | 21                       |
| 54 | Table S4                                                                     | 23                       |
| 55 | <b>REFERENCES</b>                                                            | <b>24</b>                |
| 56 |                                                                              |                          |

## 57 SUPPLEMENTAL METHODS

### 58 **Bacterial strains and culture conditions.**

59 Bacterial strains used in this study are summarized in Table S1. *Escherichia coli* JM109 was the  
60 host for plasmid propagation, *E. coli* ET12567/pUZ8002 for conjugation, and *E. coli* strains  
61 BL21(DE3) pLysS Star and TOP10 for protein expression and purification. All *E. coli* strains were  
62 cultured in Luria Bertani broth (LB) or on agar plates supplemented), except for TOP10, which  
63 was cultured in 2×YE liquid medium. Antibiotics were added where appropriate (ampicillin 100  
64 µg ml<sup>-1</sup>; kanamycin 50 µg ml<sup>-1</sup>; chloramphenicol 25 µg ml<sup>-1</sup>). Media for growth of *Streptomyces*  
65 are described in the *Streptomyces* laboratory manual (1). *Streptomyces* sp. QL37 and its  
66 derivatives were grown on SFM agar plates for sporulation, on SFM agar supplemented with  
67 60 mM MgCl<sub>2</sub> and 60 mM CaCl<sub>2</sub> for conjugation, on R5 agar for protoplast transformation,  
68 and in YEME liquid medium for genomic DNA preparation. For the analysis of LugOII proteins,  
69 *lugOII* was cloned behind the constitutive *ermE* promoter and inserted into the conjugative  
70 plasmid pWHM3-*oriT*; this construct was introduced in *Streptomyces* sp. QL37  $\Delta$ *lugOII* by  
71 conjugation. For studies on angucycline and limamycin production, *Streptomyces* sp. QL37 was  
72 grown on R5 agar supplemented with 0.8% peptone and 1% mannitol for seven days at 30 °C.  
73 Whereas, MM agar supplemented with 0.5% glycerol and 1% mannitol was used for  
74 lugdunomycin production studies, with antibiotics (thiostrepton 20 µg ml<sup>-1</sup> and/or apramycin  
75 50 µg ml<sup>-1</sup>) where relevant.

76

### 77 **Metabolite extraction, isolation and characterization.**

78 HPLC purifications were performed on a Waters preparative HPLC system equipped with a  
79 photodiode array detector (PDA). The absorption was monitored at 220 nm, 290 nm and 350  
80 nm. LC-MS analysis was performed on Shimadzu LC-MS 9030 system comprised of a UPLC with  
81 an attached PDA, coupled to a QTOF HRMS, which uses ESI as an ionization source. NMR  
82 spectra were acquired on a Bruker AVIII-600 NMR spectrometer (Bruker BioSpin GmbH).

83 Compound **5** (containing a smaller amount of **4**) was isolated and identified previously  
84 (**2**). Compound **4** was isolated from a *lugOI* null mutant of *Streptomyces* sp. QL37 (our  
85 unpublished data). TO do so, 100 µL fresh spores ( $1 \times 10^7$ ) of the mutant strain were inoculated  
86 onto R5 agar plates (7.5 L; 25 mL × 300 plates) supplemented with 0.8% peptone and 1%

87 mannitol, and then incubated at 30 °C for seven days. The agar was cut into small blocks and  
88 homogenized with a pestle. The resultant lysate was extracted three times with an equal  
89 volume of ethyl acetate by soaking for 24 h at room temperature. The extract was centrifuged  
90 and evaporated under reduced pressure at 40 °C to obtain a dry mass of 7.8 g. The crude  
91 extract was adsorbed on silica gel and loaded on a silica gel column (VLC, 125 × 50 mm, 60 Å  
92 pore size, 230-400 mesh, Sigma). One column volume of *n*-hexane was applied to de-fat the  
93 solution. A gradient elution was employed from ethyl acetate to methanol, which generated  
94 15 fractions. Fractions containing **4** (eluted with ethyl acetate–methanol 3:1) were confirmed  
95 by LC-MS and UV spectrum analysis, and were then pooled and concentrated to obtain 1.4 g  
96 dry mass. After dissolving in methanol, the pooled fractions were subjected to a preparative  
97 scale HPLC for the purification of **4**. A linear gradient of water and acetonitrile (solvent A =  
98 H<sub>2</sub>O; solvent B = acetonitrile; 0–30 min, 20% to 80% B) at a flowrate of 12 mL/min was used  
99 to purify the compound on a SunFire C<sub>18</sub> column (10 μm, 100 Å, 19 × 150 mm). The UV  
100 chromatogram was monitored at 220, 290 and 355 nm. HPLC peaks were manually collected  
101 and dried to yield pure **4** (2 mg). The compound was identified by matching its retention time,  
102 UV, and MS data to 8-*O*-methylrabelomycin which was previously identified by NMR from the  
103 wild type strain (**2**).

104 **8-*O*-methylrabelomycin (**4**):** bright yellow solid; UV λ<sub>max</sub> (LC-MS): 221, 266, 417 nm; HRESIMS  
105 *m/z* 353.1023 [M+H]<sup>+</sup> (calcd for C<sub>20</sub>H<sub>16</sub>O<sub>6</sub>, 353.1020).

106 **1-deoxy-1-hydroxy-8-*O*-methylrabelomycin (**7**) (**2**):** yellow solid; UV λ<sub>max</sub> (LC-MS): 220, 260,  
107 285, 433 nm; HRESIMS *m/z* 355.1173 [M+H]<sup>+</sup> (calcd for C<sub>20</sub>H<sub>19</sub>O<sub>6</sub>, 355.1176); <sup>1</sup>H and <sup>13</sup>C NMR  
108 data (Table S4, Data S2).

109 **SM 196B (**8**) (**3**):** yellow solid; UV λ<sub>max</sub> (LC-MS): 218, 259, 381 nm; HRESIMS *m/z* 339.1229  
110 [M+H]<sup>+</sup> (calcd for C<sub>20</sub>H<sub>19</sub>O<sub>5</sub>, 339.1227); <sup>1</sup>H and <sup>13</sup>C NMR data (Table S4, Data S3).

111

#### 112 LC-MS/MS-based peptide identification.

113 For identification of LugOII proteins, *Streptomyces* sp. QL37 Δ*lugOII* harbouring plasmid  
114 pWHM3-*ermEp-lugOII* was incubated in 250 ml TSB medium in 1 L Erlenmayer flasks at 30°C  
115 for 5 days. Cells were centrifugated and lysed by sonication, followed by removing of the cell  
116 debris. The soluble supernatant was dialyzed in 20 mM Tris, pH 7.5 and loaded on a monoQ  
117 ion-exchange chromatography column. Elution was performed with a gradient 20 mM Tris, 1

118 M NaCl, pH 7.5. The protein fractions were detected by sodium dodecylsulfate polyacrylamide  
119 gel electrophoresis (SDS-PAGE). The sequences of the targeted bands were identified by LC-  
120 MS/MS peptide analysis.

121 The semi-purified crude extract of LugOII overexpression strain was process by SDS-PAGE and  
122 stained with Coomassie. The target bands were excised into small cubes and destained with  
123 0.1 M ammonium bicarbonate/acetonitrile (1:1, v/v). Saturated gel pieces were digested with  
124 trypsin (0.1 µg, recombinant, proteomics grade, Roche) at 37°C overnight. The digestion  
125 solution was withdrew and further desalted using STAGE-Tipping (4). Briefly, peptide was  
126 loaded on a conditioned StageTip with 2 pieces of 1 mm diameter SDB-XC plug (Empore),  
127 washed twice with 0.5% formic acid solution, and eluted with elution solution (80%  
128 acetonitrile, 0.5% formic acid). Acetonitrile was then evaporated in a SpeedVac. Sample  
129 solution (3% acetonitrile, 0.5% formic acid) was added for analysis.

130 Peptides were injected and analysed by reversed-phase liquid chromatography on a  
131 nanoAcquity UPLC system (Waters) equipped with HSS-T3 C18 1.8 µm, 75 µm X 250 mm  
132 column (Waters). A gradient from 1% to 40% acetonitrile in 60 min (ending with a brief  
133 regeneration step to 90% for 3 min) was applied. [Glu<sup>1</sup>]-fibrinopeptide B was used as lock mass  
134 compound and sampled every 30 s. Online MS/MS analysis was done using Synapt G2-Si HDMS  
135 mass spectrometer (Waters) with an UDMS<sup>E</sup> method set up as described in (5).

136 Raw data from all samples were first analysed using the vender software ProteinLynx Global  
137 SERVER (PLGS) version 3.0.3. Generally, mass spectrum data were generated using an MS<sup>E</sup>  
138 processing parameter with charge 2 lock mass 785.8426, and default energy thresholds. For  
139 protein identification, default workflow parameters except an additional acetyl in N-terminal  
140 variable modification were used. Reference protein database was downloaded from GenBank  
141 with the accession number NC\_003888.3.

142

#### 143 **LC-MS analysis of metabolites.**

144 LC-MS/MS acquisition was performed using Shimadzu Nexera X2 UHPLC system, with attached  
145 PDA, coupled to Shimadzu 9030 QTOF mass spectrometer, equipped with a standard ESI  
146 source unit, in which a calibrant delivery system (CDS) is installed. Samples were dissolved in  
147 MeOH to a final concentration of 1 mg/mL, and 2 µL were injected into a Waters Acquity HSS  
148 C<sub>18</sub> column (1.8 µm, 100 Å, 2.1 × 100 mm). The column was maintained at 30 °C, and run at a

149 flow rate of 0.5 mL/min, using 0.1% formic acid in H<sub>2</sub>O as solvent A, and 0.1% formic acid in  
150 acetonitrile as solvent B. A gradient was employed for chromatographic separation starting at  
151 5% B for 1 min, then 5 – 85% B for 9 min, 85 – 100% B for 1 min, and finally held at 100% B for  
152 4 min. The column was re-equilibrated to 5% B for 3 min before the next run was started. The  
153 PDA acquisition was performed in the range 200 – 600 nm, at 4.2 Hz, with 1.2 nm slit width.  
154 The flow cell was maintained at 40 °C.

155 All samples were analyzed in positive polarity, using data dependent acquisition mode. In this  
156 regard, full scan MS spectra ( $m/z$  100–2000, scan rate 20 Hz) were followed by three data  
157 dependent MS/MS spectra ( $m/z$  100–2000, scan rate 20 Hz) for the three most intense ions  
158 per scan. The parameters used for the ESI source were: interface voltage 4 kV, interface  
159 temperature 300 °C, nebulizing gas flow 3 L/min, and drying gas flow 10 L/min. The instrument  
160 was calibrated using standard NaI solution (Shimadzu) before each run sequence. Additionally,  
161 a calibrant solution consisting of the Agilent API-TOF reference mass solution kit was  
162 introduced through the CDS system, the first 0.5 min of each run, and the masses detected  
163 were used for post-run mass correction of the file, ensuring stable accurate mass  
164 measurements.

165

166 **SUPPLEMENTAL FIGURES**

167

168

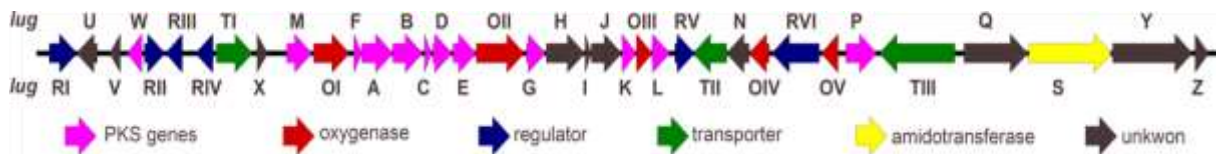

169

170 **Figure S1. Graphical representation of the *lug* gene cluster of *Streptomyces* sp. QL37.** The  
 171 *lug* cluster, which is responsible for the biosynthesis of lugdunomycin (2), contains genes  
 172 encoding polyketide synthases (pink), tailoring enzymes (red), regulators (blue) and  
 173 transporters (green). The gene *lugOII* that is located downstream of *lugA-F* (the minimal PKS  
 174 genes) encodes a two-domain oxidoreductase and is the subject of this study. Hypothetical  
 175 genes are labeled in black.

176

177

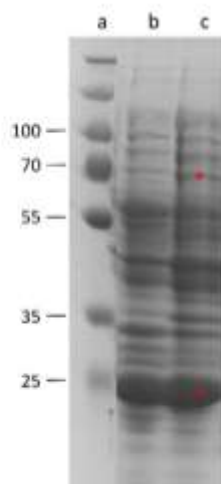

178

179 **Figure S2. SDS-PAGE analysis of semi-purified LugOII isoforms.** Lane a, protein marker (in  
 180 kDa). Lane b and c, LugOII full-length gives a band corresponding to a protein of 70-kDa, while  
 181 the reductase domain of LugOII generates a band at 27-kDa. LugOII was overexpressed in  
 182 *Streptomyces* sp. QL37 (*OII*<sup>-</sup>) and purified by employing ion exchange chromatography (IEX)  
 183 using a monoQ column. Both bands were analysed by in-gel digestion followed by LC-MS/MS  
 184 analysis, confirming the presence of two isoforms of LugOII (LugOII full-length and the  
 185 separated reductase domain, labeled by asterisks).

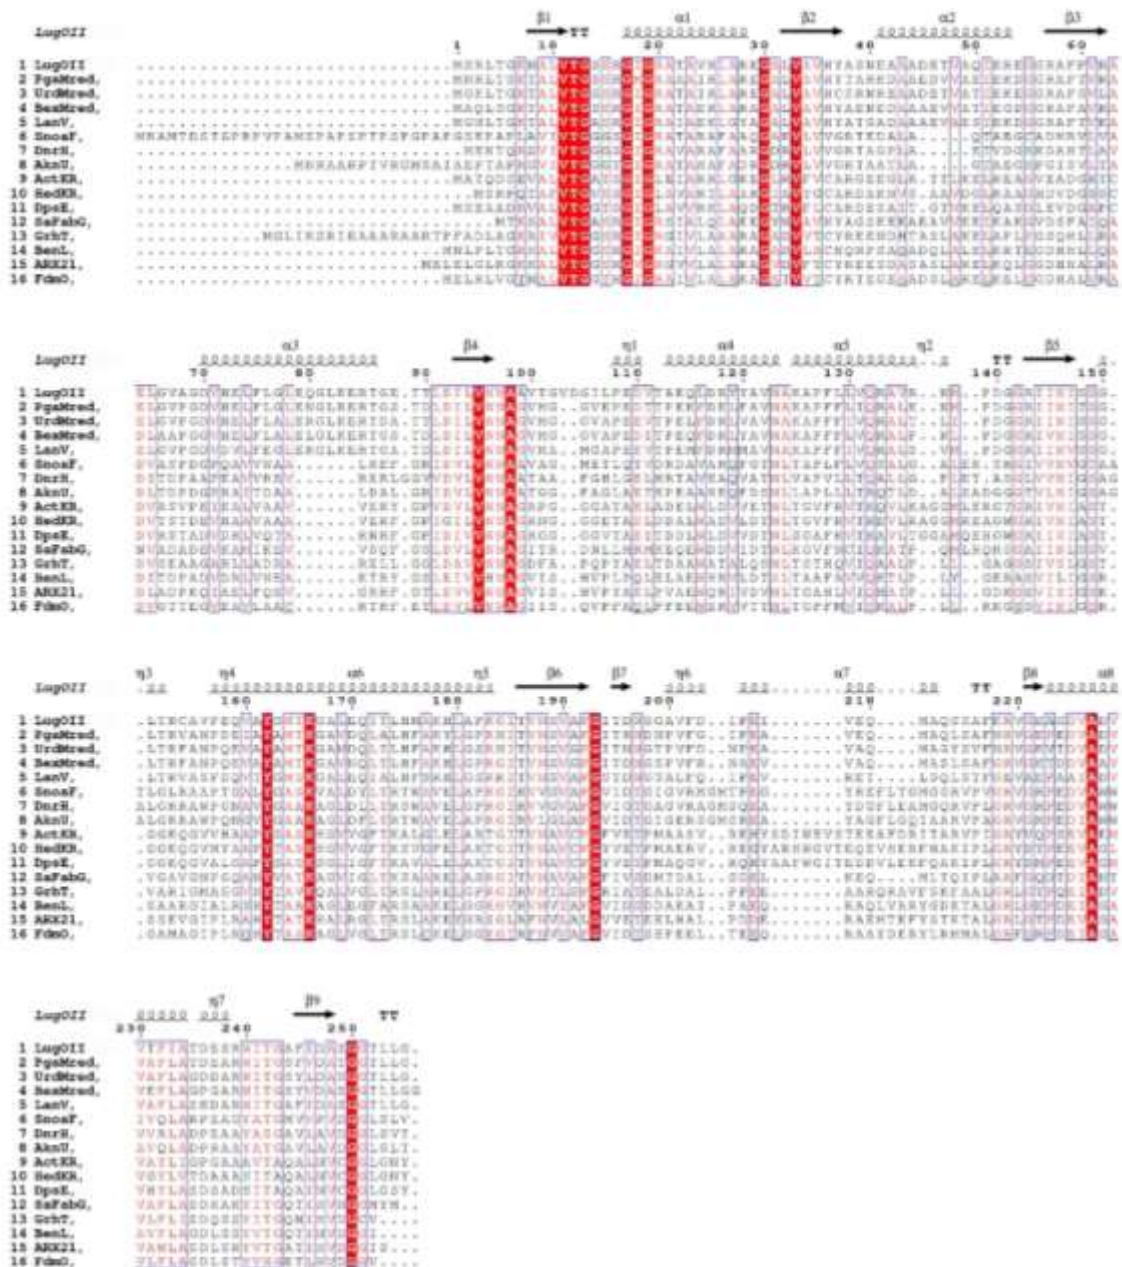

186

187 **Figure S3. Multi-sequence alignment of LugOII and the functionally characterized keto-**  
 188 **reductase (KRs).** Sequences include PgaMred from *Streptomyces* sp. PGA64, UrdMred from  
 189 *Streptomyces fradiae* Tu 2717, BexMred from *Streptomyces fulvissimus* DSM 40593, SnaoF  
 190 from *Streptomyces nogalater*, AknU from *Streptomyces galilaeus*, DnrH from *Streptomyces*  
 191 *peucetius*, DpsE from *Streptomyces peucetius*, HedKR from *Streptomyces griseoruber*, ActKR  
 192 from *Streptomyces coelicolor* (Muller 1908), ARX21 from uncultured bacterium, BenL from  
 193 *Streptomyces* sp. A2991200, GrhT from *Streptomyces* sp. CN48+, and FdmO from  
 194 *Streptomyces griseus*. The secondary structural features are labeled on the top of the  
 195 sequence based on the crystal structure of LugOII.



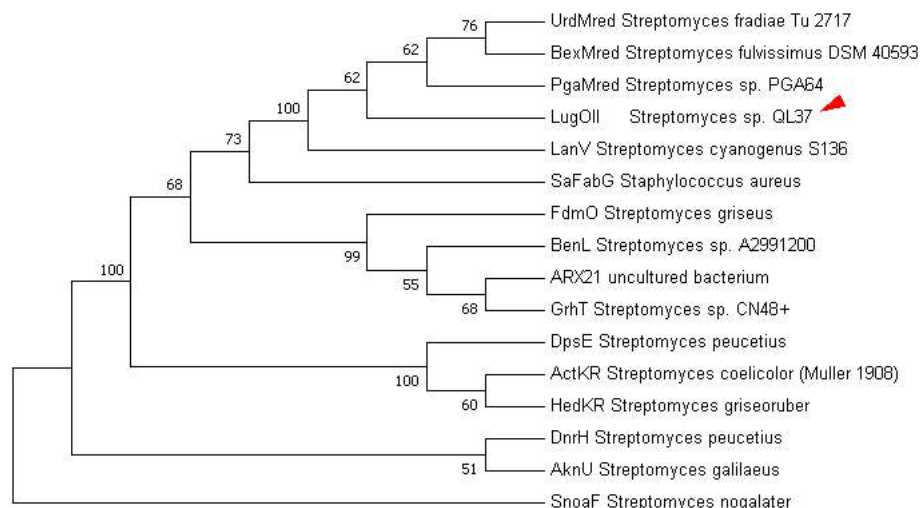

196

197 **Figure S4. An unrooted maximum likelihood tree of the KR domains that are related to LugOII.** The  
 198 phylogenetic tree was drawn as a consensus model. Bootstrap values are shown at each node  
 199 as percentage of 1000 replicates.

200

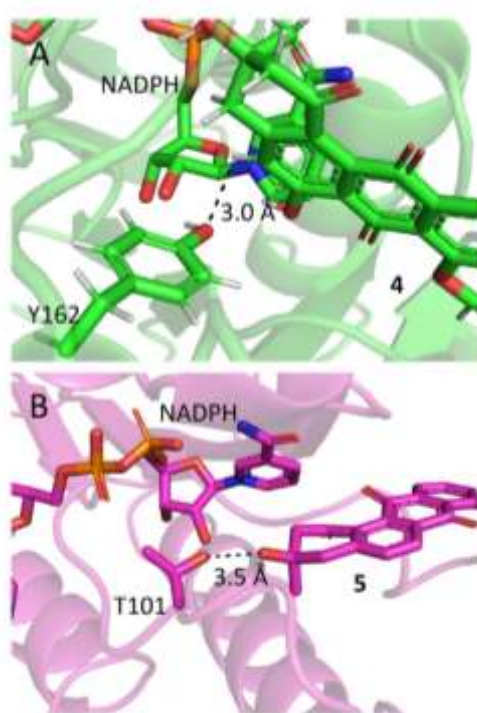

201

202 **Figure S5. The interactions between the ligands and the key residues of LugOII structure.**  
 203 The residues and ligands are shown in sticks. (A) The distance between the OH group of Y162  
 204 and C5 of ligand 4 is around 3.0 Å. (B) The hydrogen bond between T101 and ligand 5 is around  
 205 3.3 Å.

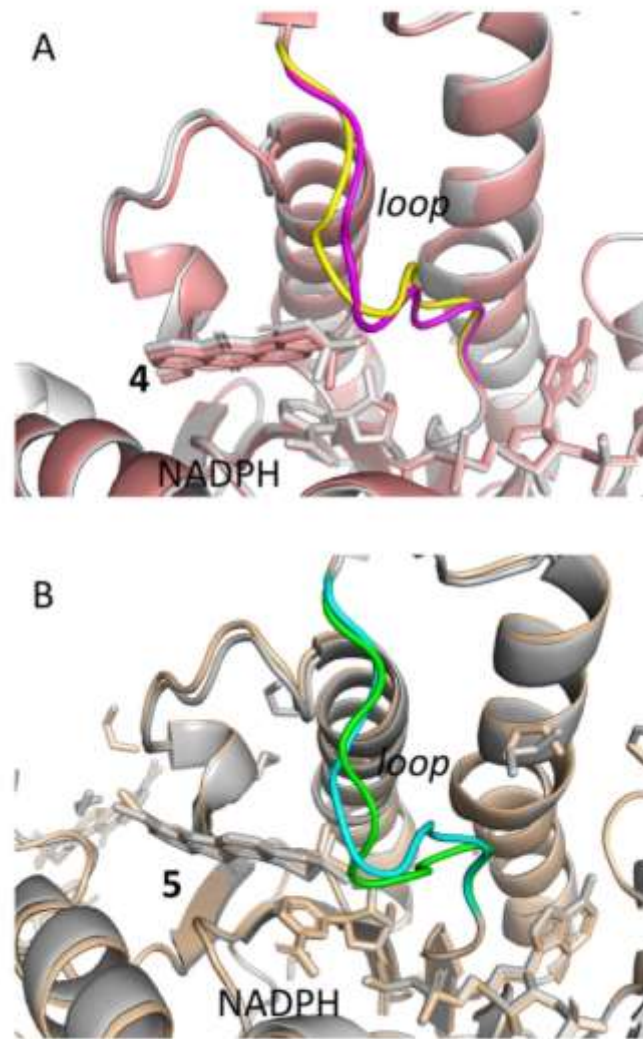

207

208 **Figure S6. Alignment of the different chains from LugOII complex structures. Ligands are**  
 209 **shown in sticks.** (A) Superimposition of chain A and B in the ligand **4** bonded LugOII structure.  
 210 The loop region of chain A is highlighted in yellow and that of chain B in magenta. (B)  
 211 Superimposition of chain A and B in ligand **5** bonded LugOII structure. The loop region of chain  
 212 A is highlighted in green and that of chain B in cyan. Related to Figure 4.

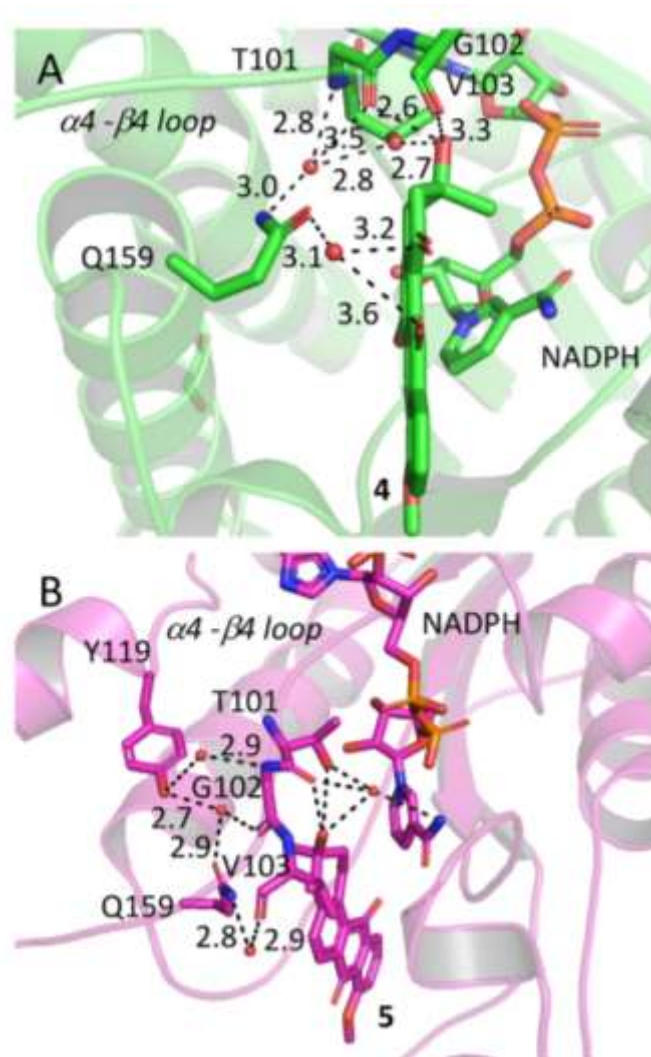

213

214 **Figure S7. Interaction network of Q159 in LugOII complex structures.** The ligands and  
 215 residues are shown in sticks. Interactions of Q159 with T101, G102, V103, and either  
 216 compound **4** (A) or **5** (B), via water molecules that stabilize the  $\alpha 4$ - $\beta 4$  loop.

217

218 **SUPPLEMENTAL DATA**

219 **Scheme S1. Postulated lugdunomycin biosynthetic pathway (2).** Flavoenzyme (LugOI),  
 220 methyl transferase (LugM) and keto-reductase (LugOII) are proposed to react sequentially in  
 221 the early steps of angucycline biosynthesis, as part of the lugdunomycin biosynthetic pathway.

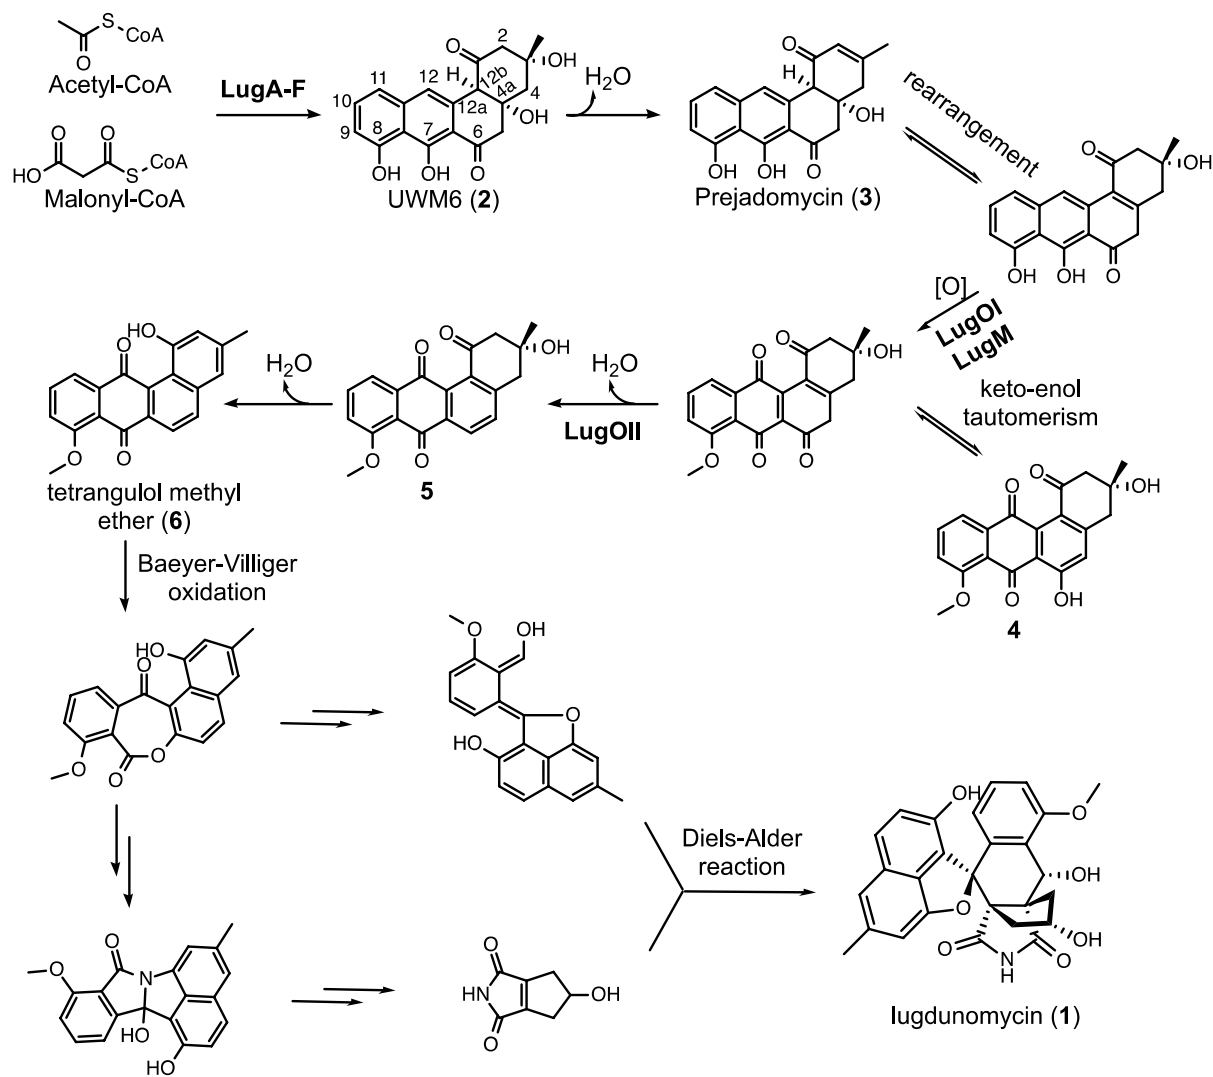

222

223

224 **Data S1. LC-MS analysis of the metabolite profiles from the extracts derived from wild-type**  
225 **S sp. QL37,  $\Delta lugOII$  and  $\Delta lugOII::lugOII$ .** (A) Extracted ion chromatogram of the wild-type,  
226  $\Delta lugOII$  and  $\Delta lugOII::lugOII$  strains grown on R5 medium (containing 0.8% peptone and 1%  
227 mannitol). Deletion of *lugOII* blocks the production of **5**, **6** and **9**, while its introduction under  
228 the control of *ermE* promoter restores their production. (B) Extracted ion chromatogram of  
229 the wild-type and  $\Delta lugOII$  and  $\Delta lugOII::lugOII$  strains grown on MM medium (containing 0.5%  
230 glycerol and 1% mannitol). Deletion of *lugOII* blocks the production of **1**, **5**, **6** and **9**. The  
231 complementation of *lugOII* didn't work. Note that **1** is only produced in MM medium.

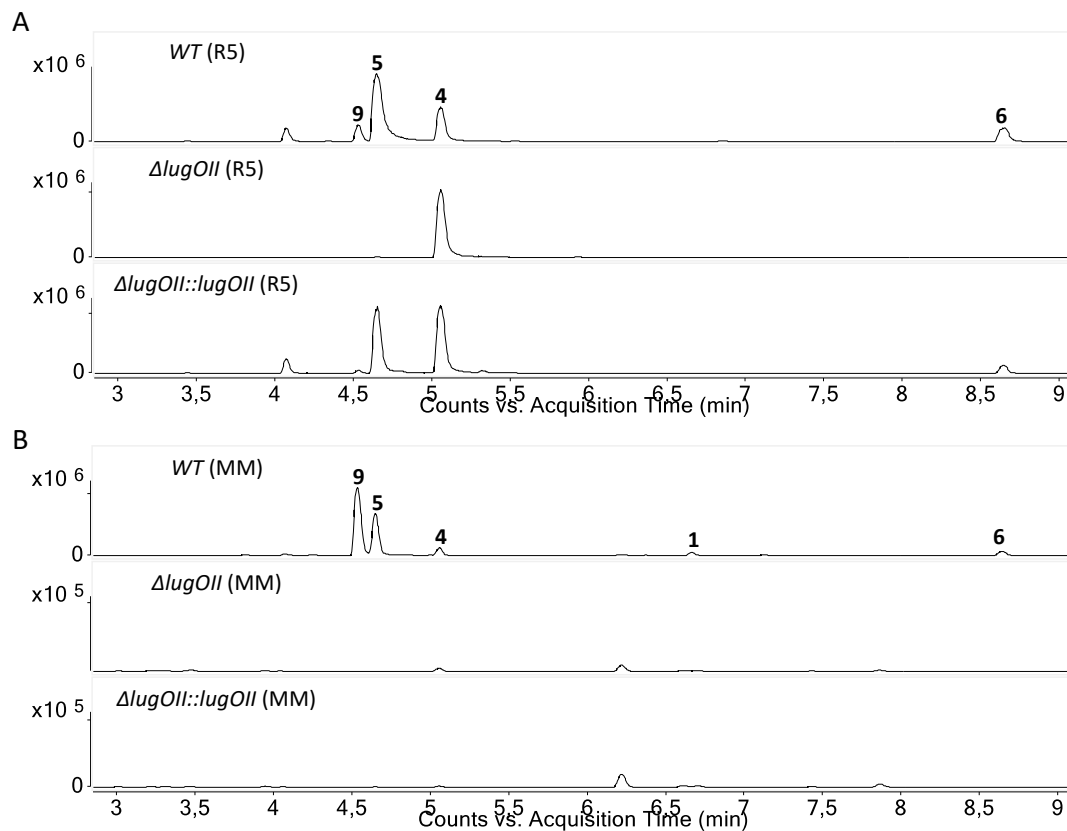

232

233

234 **Data S2. Spectroscopic data of compound 7.**

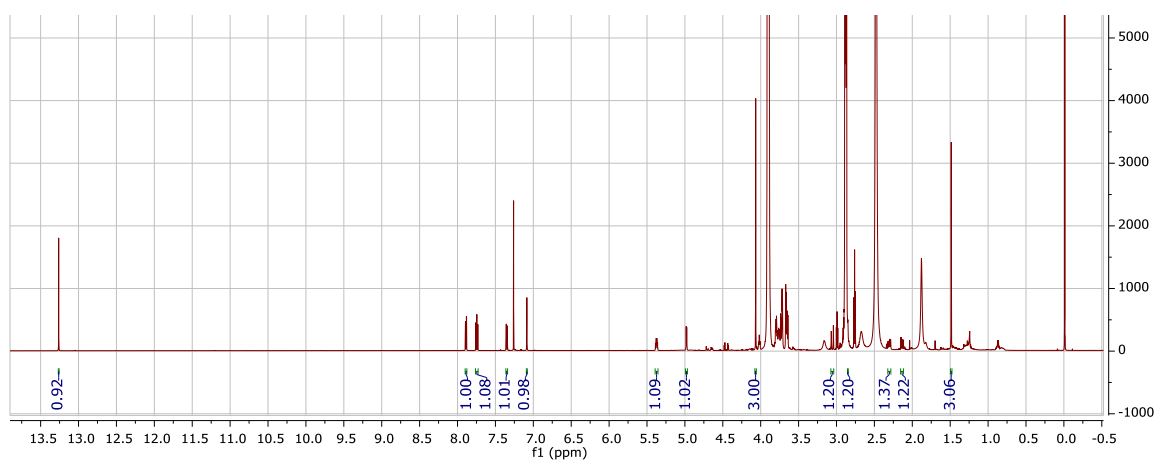

235

236 1H NMR spectrum of **7** in CDCl<sub>3</sub> (600 MHz, 298 K).

237

238

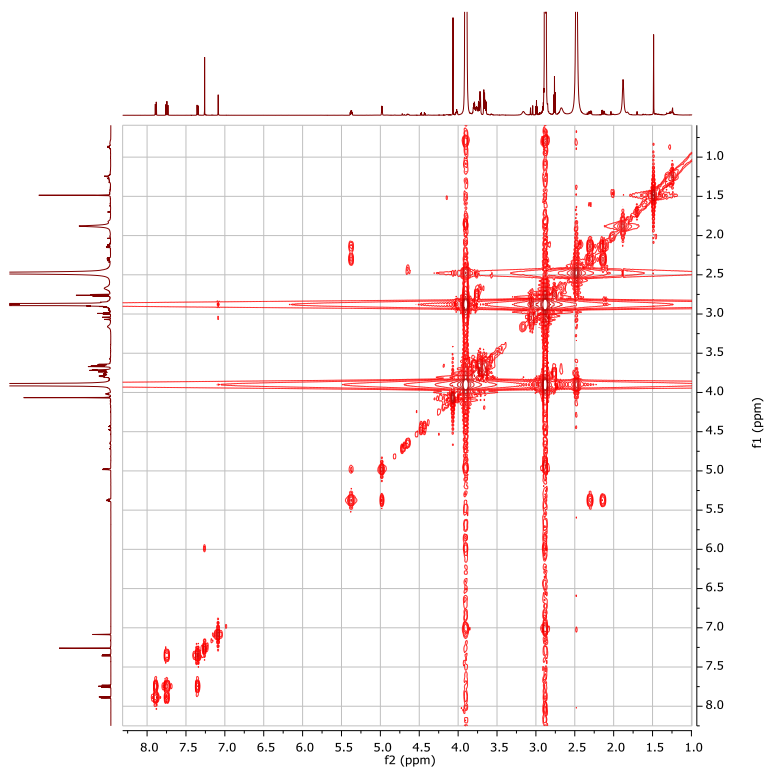

239

240 COSY spectrum of **7** in CDCl<sub>3</sub> (600 MHz, 298 K).

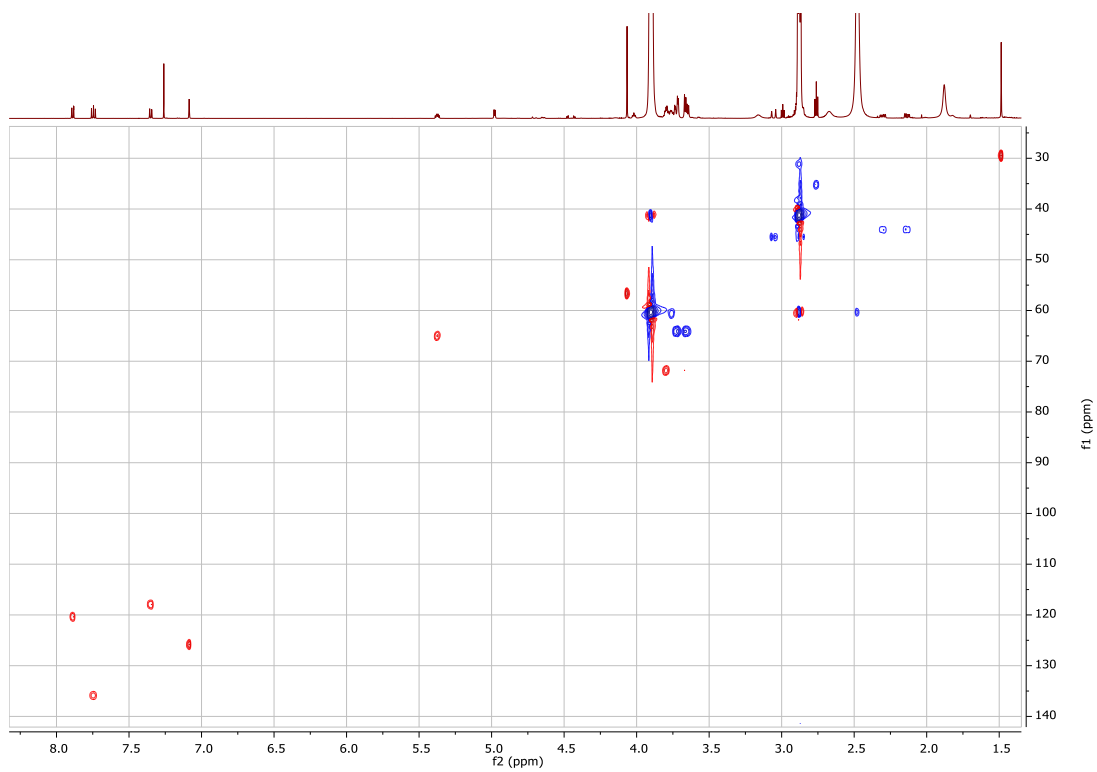

241

242 Multiplicity-edited HSQC spectrum of **7** in CDCl<sub>3</sub> (600 MHz, 298 K).

243

244

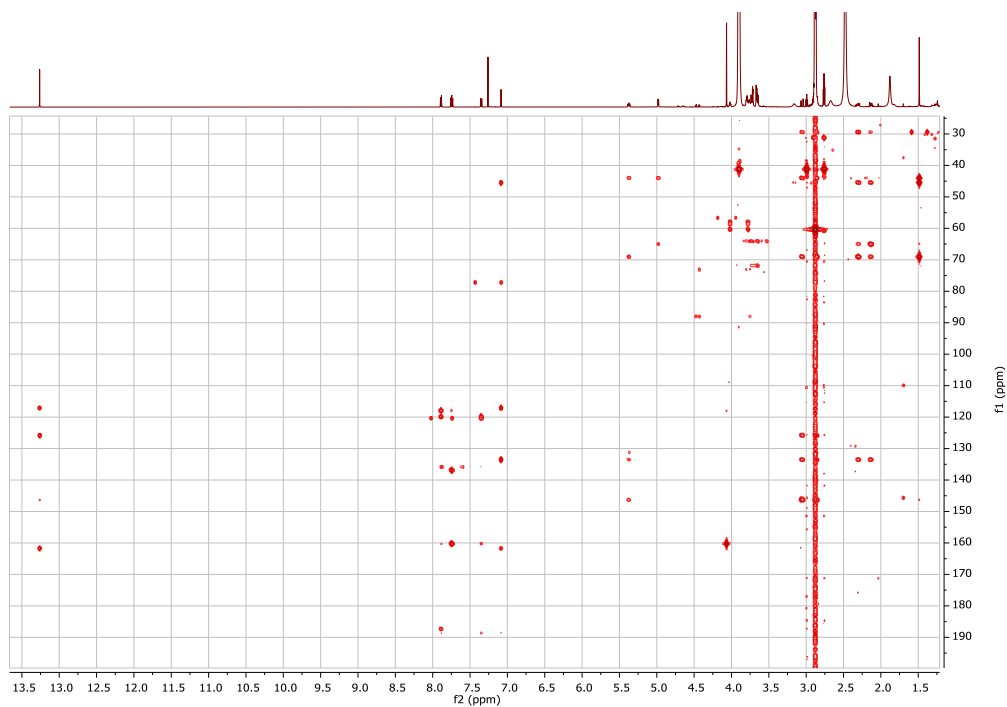

245

246 HMBC spectrum of **7** in CDCl<sub>3</sub> (600 MHz, 298 K).

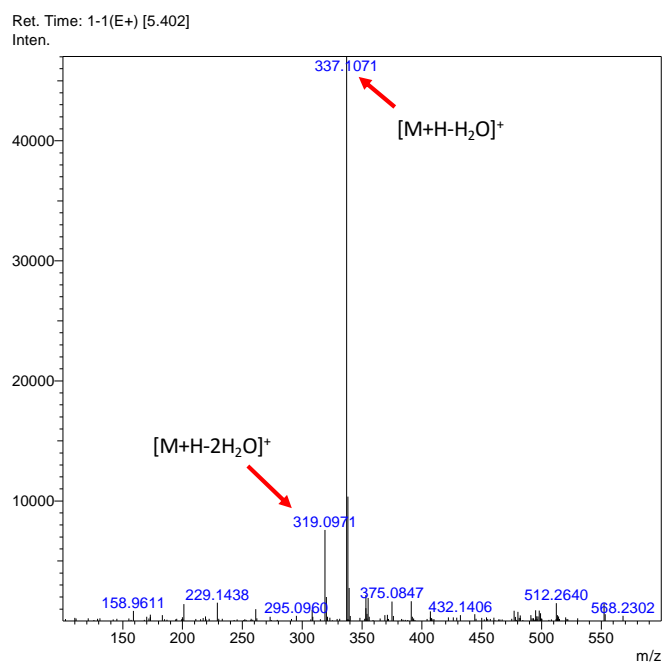

247

248 (+)-HR-ESI-MS spectrum of **7**.

249

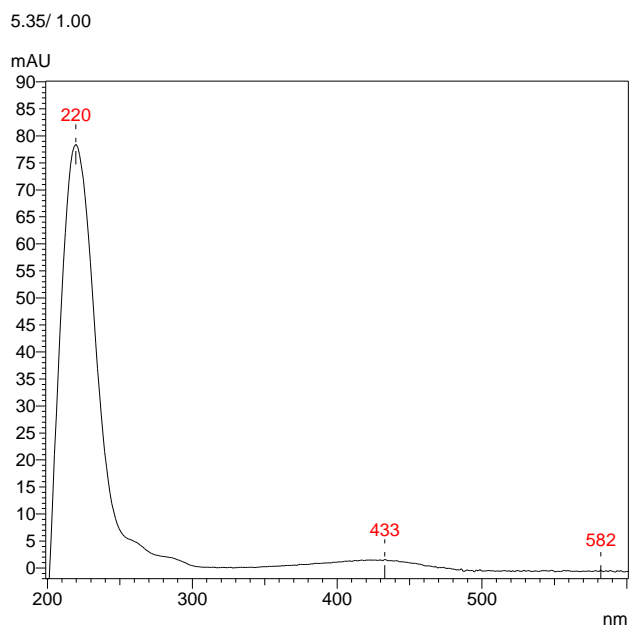

250

251 UV spectrum of **7**.

252



253 **Data S3. Spectroscopic data of compound 8.**

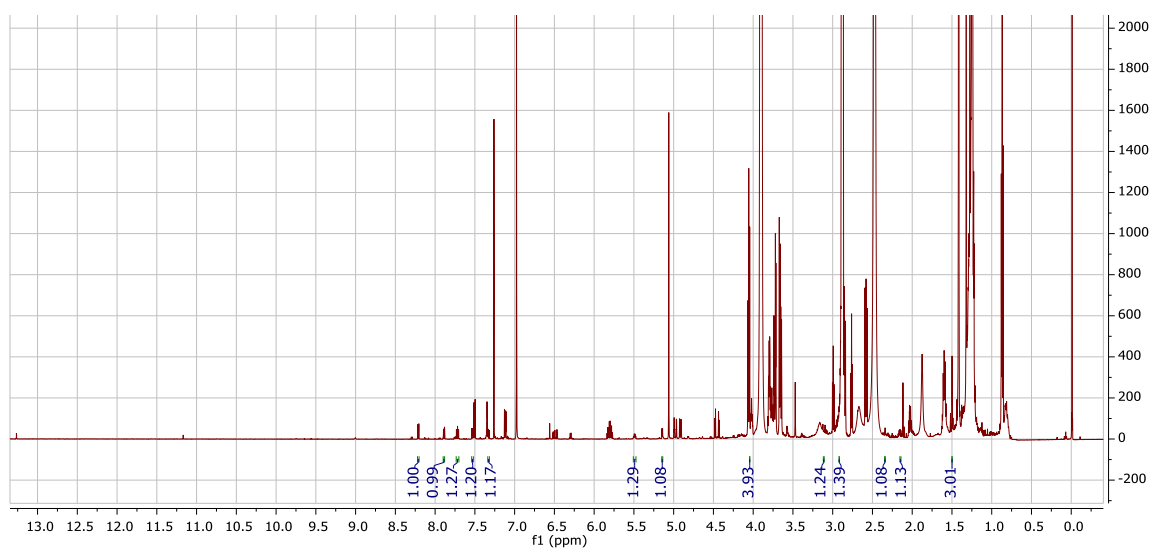

254

255  $^1\text{H}$  NMR spectrum of **8** in  $\text{CDCl}_3$  (600 MHz, 298 K).

256

257

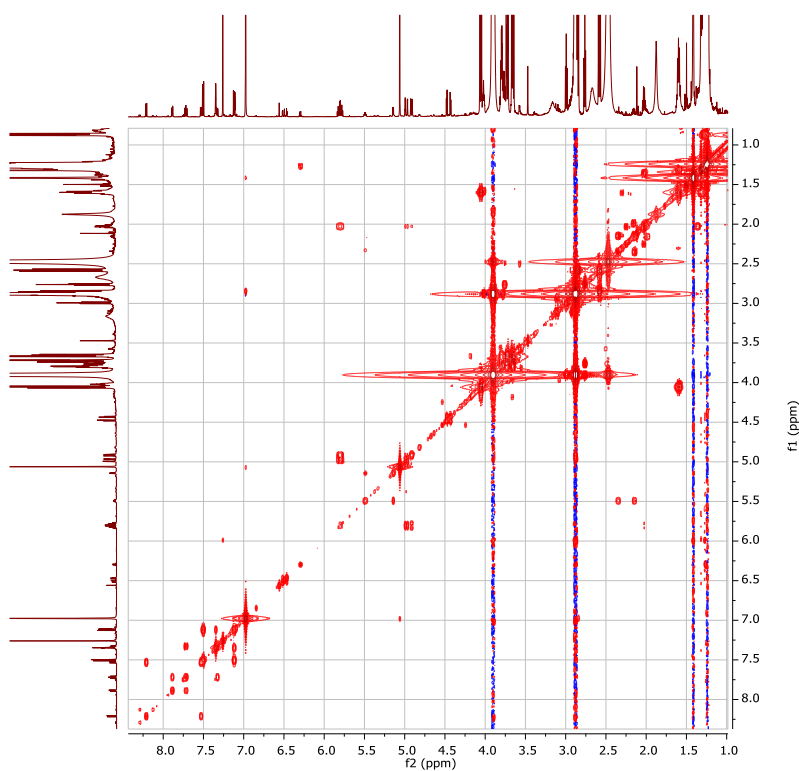

258

259 COSY spectrum of **8** in  $\text{CDCl}_3$  (600 MHz, 298 K).

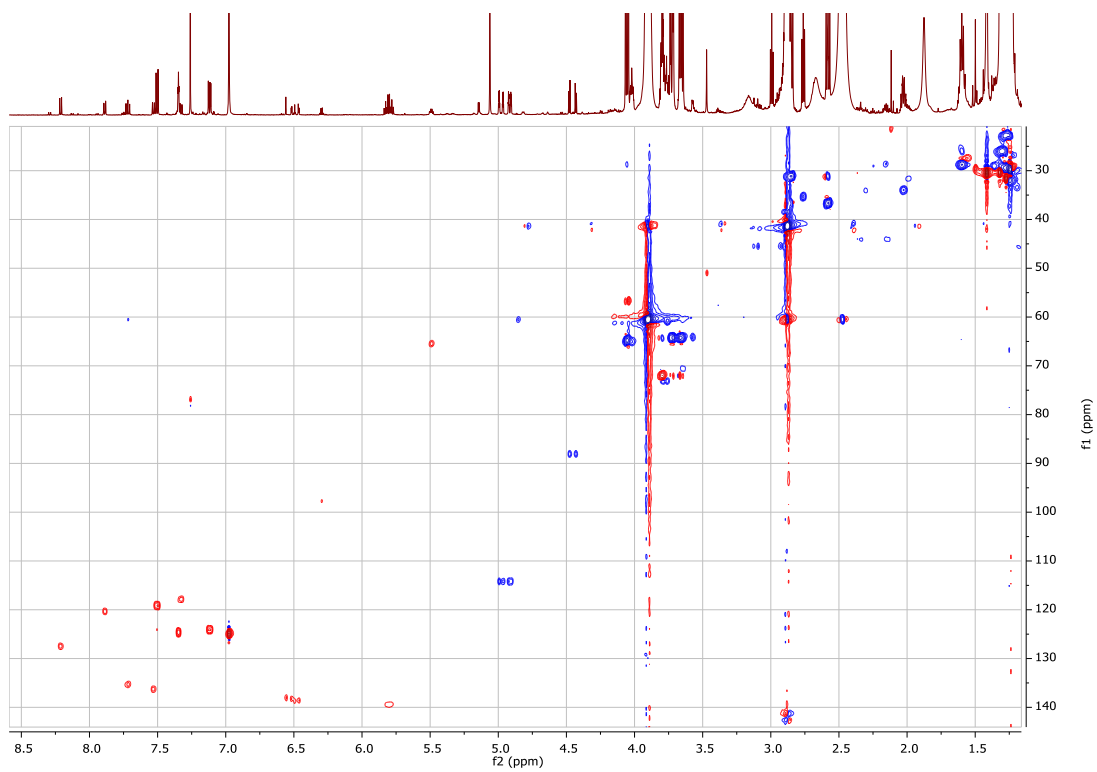

260

261 Multiplicity-edited HSQC spectrum of **8** in CDCl<sub>3</sub> (600 MHz, 298 K).

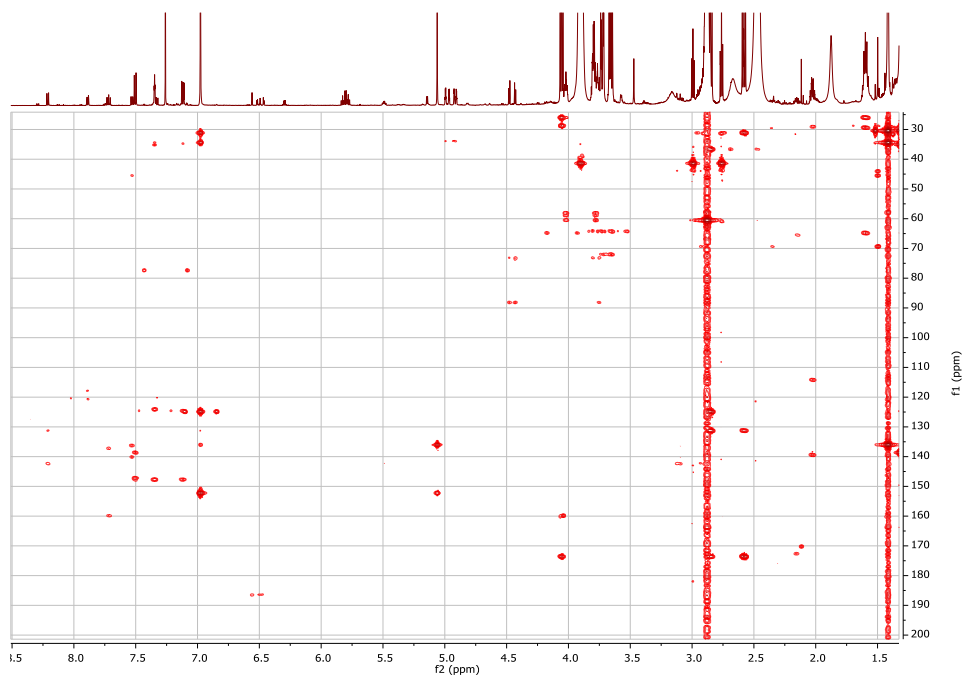

262

263 HMBC spectrum of **8** in CDCl<sub>3</sub> (600 MHz, 298 K).

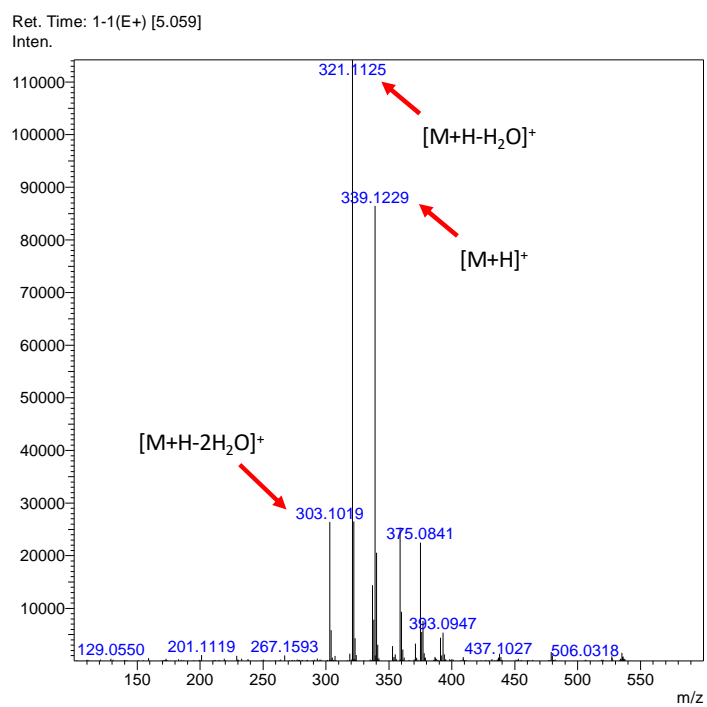

264

265 (+)-HR-ESI-MS spectrum of **8**.

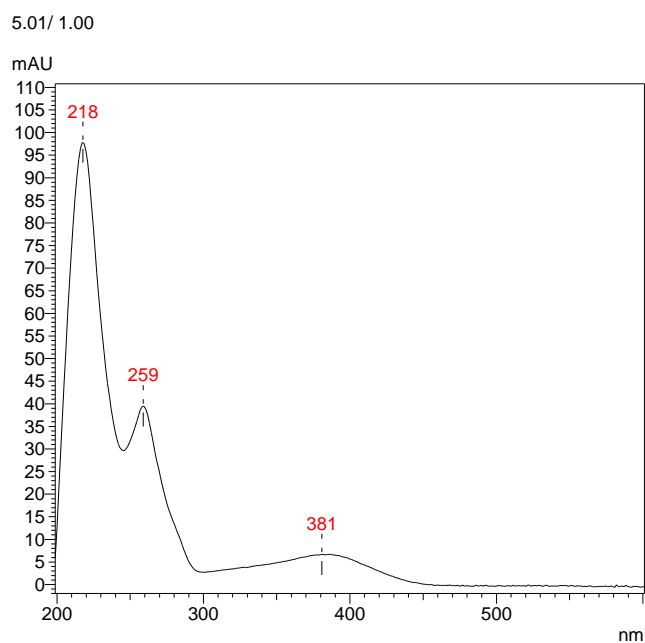

266

267 UV spectrum of **8**.

268

269 **SUPPLEMENTAL TABLES**270 **Table S1. Bacterial strains used in this study. For all the primers used, see table S2 (below).**

271

| Bacterial strains                                 | Relevant characteristics                                                                                | Metabolites produced | References |
|---------------------------------------------------|---------------------------------------------------------------------------------------------------------|----------------------|------------|
| <i>Streptomyces</i> sp. QL37                      | wild-type strain                                                                                        | <b>1, 4, 5, 6, 9</b> | This study |
| <i>Streptomyces</i> sp. QL37 (OI <sup>-</sup> )   | <i>lugOI</i> deletion mutant                                                                            | <b>4</b>             | This study |
| <i>Streptomyces</i> sp. QL37 (OII <sup>-</sup> )  | <i>lugOII</i> deletion mutant                                                                           | <b>4</b>             | This study |
| <i>Streptomyces</i> sp. QL37 (OII <sup>-</sup> 1) | <i>lugOII</i> deletion mutant harbouring pWHM3- <i>oriT</i> - <i>permE</i> <sup>*</sup> - <i>lugOII</i> | <b>4, 5, 6, 9</b>    | This study |
| <i>Streptomyces</i> sp. QL37 (OII <sup>+</sup> 1) | wild-type harbouring pWHM3- <i>oriT</i> - <i>permE</i> <sup>*</sup> - <i>lugOII</i>                     | <b>4, 5, 6, 9</b>    | This study |
| <i>E. coli</i> JM109                              | Strain for plasmid propagation                                                                          | -                    | (6)        |
| <i>E. coli</i> ET12567/pUZ8002                    | <i>E. coli</i> host for conjugative transfer of plasmids to <i>Streptomyces</i>                         | -                    | (7)        |
| <i>E. coli</i> BL21(DE3) pLysS Star               | <i>E. coli</i> host for over-expression of proteins                                                     | -                    | (8)        |

272

273

274 **Table S2. Primers used for amplifying the DNA sequences in this study.**

| Name of primers | Oligonucleotide sequence (5' -> 3')       |
|-----------------|-------------------------------------------|
| LugOII_fw       | gtcaCATATGagcaggctcacgggcaagaacgcac       |
| LugOII_rv       | gtcaAAGCTTtcatccgaggagcgtcccgccgctcgcgctc |
| lugM_fw         | gtcaCATATGactgcgcagcaccctgttgggaag        |
| lugM_rv         | gtcaAAGCTTtcagcggctcctgtggcccagcaccagc    |
| LugOII_V156A_fw | ctgcgccGCAccggagcaggtc                    |
| LugOII_V156A_rv | cgggtgagaccggagcagatg                     |
| LugOII_S214Y_fw | ggcgagTACTccgccttcaagcgc                  |
| LugOII_S214Y_rv | atctgctccacgatctcggggatg                  |
| LugOII_C154F_fw | tcaccgctTcgccgtgccggag                    |
| LugOII_C154F_rv | gcacggcgAagcgggtgagaccg                   |
| LugOII_Q159A_fw | gtgccggagGCAgtcgcgtactcgtatgacc           |

|                      |                                          |
|----------------------|------------------------------------------|
| LugOII_Q159A_rv      | gtacgcgacTGCctccggcacggcgc               |
| LugOII_ΔV103_fw      | cgtcaccggagacggcataactccccgag            |
| LugOII_ΔV103_rv      | gtatgccgtctccggtgacggccgc                |
| LugOII_ΔV103ΔD104_fw | gggagtatgcctccggtgacggccgc               |
| LugOII_ΔV103ΔD104_rv | gccgtcaccggaggcataactccccgag             |
| LugOII_T101M_fw      | cgtccactccCAtgacggccgcgcttg              |
| LugOII_T101M_rv      | gcggccgtcaTGGgagtggacggc                 |
| LugOII_I194S_fw      | tccgccgttgctggTGAccccggtgccacgctgtt      |
| LugOII_I194S_rv      | agcgtggcaccgggaTCAaccgacaacggcggagcg     |
| dLugOII_check_Fw     | tcgaccacaccacggaatc                      |
| dlugOII_check_Rv     | ttcctcgccgatgtgcttgg                     |
| lugOII_LF_Fw         | cgataagcttggtaccgagctgtggctggacgtgatcaac |
| lugOII_LF_Rv         | cgattctagacgtggtgccacgggtcagc            |
| lugOII_RF_Fw         | cgattctagaggcgggacgctcctcggatg           |
| lugOII_RF_Rv         | cgatgaattcggtagggccggcgagtagg            |
| lugOI_KO_check_Fw    | cgagtccatgcctgatgaag                     |
| lugOI_KO_check_Rv    | gcgacgatcagagtgccttgg                    |
| lugOI-LF-Fw          | cgataagcttagatcttccatcccgccttctgaagac    |
| lugOI-LF-Rv          | cgattctagagactacgactgatgcgtccatgtg       |
| lugOI-RF-Fw          | cgattctagaggaccggccaggtgagattc           |
| lugOI-RF-Rv          | cgatggtaccgccggtcgttctgcttggtc           |
| lugOII_OE_Fw         | cgatGGATCCATATGGGCACCACGCGCGACGCGGAC     |
| lugOII_OE_Rv         | cgatGGATCCGTGCACCGAGGACGGCTCATC          |

275 **Table S3. X-Ray data collection, processing and refinement.**

|                        | <b>Apo</b> LugOII | NADPH binary complex | NADPH plus 4 ternary complex | NADPH plus 5 ternary complex |
|------------------------|-------------------|----------------------|------------------------------|------------------------------|
| <b>Data collection</b> |                   |                      |                              |                              |
| PDB accession code     | 6YQ6              | 6YPZ                 | 6YQ3                         | 6YQ0                         |
| Beamline               | X06DA             | X06DA                | BL13B1                       | X06DA                        |
| Wavelength (Å)         | 1.0               | 1.0                  | 1.0                          | 1.0                          |
| Detector               | PILATUS 2MF       | PILATUS 2MF          | ADSC Quantum-315 CCD         | PILATUS 2MF                  |

|                                          |                                                   |                           |                                            |                                             |
|------------------------------------------|---------------------------------------------------|---------------------------|--------------------------------------------|---------------------------------------------|
| Resolution range<br>(Å) <sup>a</sup>     | 47.47-2.08<br>(2.13-2.08)                         | 49.3-1.08<br>(1.108-1.08) | 24.70-1.57<br>(1.61-1.57)                  | 49.49-1.08<br>(1.108-1.08)                  |
| Space group                              | P6 <sub>1</sub> 22                                | I121                      | I121                                       | I121                                        |
| A, b, c (Å)                              | 185.99, 185.99,<br>75.64                          | 110.31, 59.97,<br>87.83   | 87.97, 60.21,<br>88.31                     | 110.47, 60.38,<br>88.1                      |
| α, β, γ (°)                              | 90.0, 90.0,<br>120.0                              | 90.0, 128.5,<br>90.0      | 90.0, 102.5,<br>90.0                       | 90.0, 128.7,<br>90.0                        |
| Total observations <sup>a</sup>          | 1837762<br>(285625)                               | 1326582<br>(201219)       | 695227<br>(166021)                         | 1330599<br>(198024)                         |
| No. unique reflections <sup>a</sup>      | 87905 (14133)                                     | 428985 (67732)            | 60525 (6124)                               | 431114 (68021)                              |
| Redundancy <sup>a</sup>                  | 20.9 (20.2)                                       | 3.1 (3.0)                 | 2.9 (2.8)                                  | 3.1 (2.9)                                   |
| Completeness (%) <sup>a</sup>            | 99.8 (99.0)                                       | 95.4 (99.1)               | 98.1 (91.9)                                | 95.4 (99.0)                                 |
| Mean I/σ(I) <sup>a</sup>                 | 12.5 (1.7)                                        | 13.4 (2.1)                | 22.5 (2.7)                                 | 16.3 (3.2)                                  |
| R <sub>merge</sub> <sup>a, b</sup>       | 0.399 (2.839)                                     | 0.054 (0.679)             | 0.053 (0.464)                              | 0.049 (0.435)                               |
| R <sub>meas</sub> <sup>a, c</sup>        | 0.409 (2.912)                                     | 0.064 (0.827)             | 0.064 (0.566)                              | 0.058 (0.532)                               |
| CC <sub>1/2</sub> <sup>a, d</sup>        | 0.994 (0.431)                                     | 0.999 (0.648)             | 0.999 (0.818)                              | 0.999 (0.801)                               |
| Wilson B value<br>(Å <sup>2</sup> )      | 33.82                                             | 12.94                     | 16.88                                      | 11.77                                       |
| <b>Refinement</b>                        |                                                   |                           |                                            |                                             |
| No. of reflections <sup>b</sup>          | 44261/3168                                        | 181839/13457              | 57497/4253                                 | 183000/13494                                |
| Final R <sub>work</sub> <sup>a, c</sup>  | 0.168 (0.273)                                     | 0.146 (0.270)             | 0.142 (0.218)                              | 0.155 (0.248)                               |
| Final R <sub>free</sub> <sup>a, c</sup>  | 0.204 (0.287)                                     | 0.165 (0.266)             | 0.166 (0.239)                              | 0.170 (0.249)                               |
| R.m.s. bond<br>deviations (Å)            | 0.015                                             | 0.022                     | 0.017                                      | 0.022                                       |
| R.m.s. angle<br>deviations (°)           | 1.830                                             | 2.215                     | 2.114                                      | 2.206                                       |
| Number of atoms                          | 4027                                              | 4481                      | 4421                                       | 4583                                        |
| Number of water<br>molecules             | 363                                               | 507                       | 484                                        | 551                                         |
| Number of other<br>molecules             | 16 EDO, 4 PEG,<br>3 SO <sub>4</sub> <sup>2-</sup> | 2 NADPH, 12<br>EDO, 2 PEG | 2 compound <b>4</b> ,<br>2 NADPH, 2<br>EDO | 2 compound <b>5</b> ,<br>2 NADPH, 14<br>EDO |
| <b>Mean B-factor<br/>(Å<sup>2</sup>)</b> |                                                   |                           |                                            |                                             |
| protein                                  | 29.74                                             | 12.04                     | 17.00                                      | 10.56                                       |
| water                                    | 38.82                                             | 24.87                     | 28.60                                      | 23.10                                       |
| ligands                                  |                                                   | 9.42                      | 24.76                                      | 11.59                                       |

|                                          |       |       |       |       |
|------------------------------------------|-------|-------|-------|-------|
| others                                   | 54.25 | 22.72 | 26.63 | 17.16 |
| <b>Ramachandran plot (%)<sup>e</sup></b> |       |       |       |       |
| Favored regions                          | 97.63 | 97.80 | 97.40 | 97.22 |
| Allowed regions                          | 2.37  | 2.20  | 2.60  | 2.78  |
| Outliers                                 | 0     | 0     | 0     | 0     |

276 <sup>a</sup> Values for the outer resolution shell are given in parentheses.

277 <sup>b</sup> The data set was split into "working" and "free" sets consisting of 95 and 5% of the data, respectively. The free  
278 set was not used for refinement.

279 <sup>c</sup> The R-factors  $R_{work}$  and  $R_{free}$  are calculated as follows:  $R = \frac{\sum (|F_{obs} - F_{calc}|)}{\sum |F_{obs}|}$ , where  $F_{obs}$  and  $F_{calc}$   
280 are the observed and calculated structure factor amplitudes, respectively.

281 <sup>d</sup> Diffraction precision indicator based on  $R_{free}$  based as calculated by REFMAC5(9).

282 <sup>e</sup> As calculated using MOLPROBITY(10).

283

284

285 **Table S4. <sup>1</sup>H and <sup>13</sup>C NMR data of 7 and 8 at 298 K in CDCl<sub>3</sub> with added TMS<sup>a</sup>.**

| Position | 7                     |                                                               | 8                     |                              |
|----------|-----------------------|---------------------------------------------------------------|-----------------------|------------------------------|
|          | $\delta_C$ , type     | $\delta_H$ , mult. (J in Hz)                                  | $\delta_C$ , type     | $\delta_H$ , mult. (J in Hz) |
| 1        | 65.0, CH              | 5.37, ddd (6.9, 5.5, 4.3)                                     | 65.5, CH              | 5.49, m                      |
| 2        | 44.1, CH <sub>2</sub> | a: 2.3, ddd (13.8, 6.9, 1.8)<br>b: 2.14, ddd (13.8, 5.5, 1.4) | 44.0, CH <sub>2</sub> | a: 2.35, m<br>b: 2.15, m     |
| 3        | 69.1, C               |                                                               | 69.3, C               |                              |
| 4        | 45.5, CH <sub>2</sub> | a: 3.05, dt (16.6, 1.4)<br>b: 2.85, m                         | 45.5, CH <sub>2</sub> | a: 3.11, m<br>b: 2.91, m     |
| 4a       | 146.3, C              |                                                               | 142.3, C              |                              |
| 5        | 125.8, CH             | 7.08, d (1.1)                                                 | 136.3, CH             | 7.53, dt (8.0, 0.9)          |
| 6        | 161.7, C              |                                                               | 127.5, CH             | 8.21, d (8.0)                |
| 6a       | 117.1, C              |                                                               | 136.3, C              |                              |
| 7        | 188.6, C              |                                                               | ND <sup>c</sup> , C   |                              |
| 7a       | 119.9, C              |                                                               | 120.7, C              |                              |
| 8        | 160.2, C              |                                                               | 159.9, C              |                              |
| 9        | 118.0, CH             | 7.35, dd (8.5, 1.1)                                           | 117.9, CH             | 7.3, dd (8.5, 1.1)           |
| 10       | 135.9, CH             | 7.75, dd (8.5, 7.7)                                           | 135.3, CH             | 7.72, dd (8.5, 7.8)          |
| 11       | 120.4, CH             | 7.89, dd (7.7, 1.1)                                           | 120.3, CH             | 7.89, dd (7.8, 1.1)          |
| 11a      | 136.9, C              |                                                               | 137.2, C              |                              |

|                    |                       |               |                       |               |
|--------------------|-----------------------|---------------|-----------------------|---------------|
| 12                 | 187.3, C              |               | ND <sup>c</sup> , C   |               |
| 12a                | ND <sup>c</sup> , C   |               | 131.2, C              |               |
| 12b                | 133.5, C              |               | 140.1, C              |               |
| 1-OH               |                       | 4.98, d (4.3) |                       | 5.14, d (4.5) |
| 3-CH <sub>3</sub>  | 29.5, CH <sub>3</sub> | 1.49, s       | 29.6, CH <sub>3</sub> | 1.50, s       |
| 6-OH               |                       | 13.26, s      |                       |               |
| 8-OH               |                       |               |                       |               |
| 8-OCH <sub>3</sub> | 56.7, CH <sub>3</sub> | 4.07, s       | 56.7, CH <sub>3</sub> | 4.04, s       |

286 <sup>a</sup> <sup>1</sup>H 600 MHz, <sup>13</sup>C chemical shifts inferred from multiplicity-edited HSQC and HMBC spectra.

287 <sup>b</sup> Chemical shifts assignments were interchanged in literature(11). Re-assignments were based on the observed  
288 HMBC correlations.

289 <sup>c</sup> ND: Not determined due to lack of HMBC correlations to them.

290

291

292

## 293 REFERENCES

- 294 1. Kieser, T., Bibb, M. J., Buttner, M. J., Chater, K. F., and Hopwood, D. A. (2000) *Practical*  
295 *Streptomyces genetics*, John Innes Foundation, Norwich, U.K.
- 296 2. Wu, C. S., van der Heul, H. U., Melnik, A. V., Lubben, J., Dorrestein, P. C., Minnaard, A.  
297 J., Choi, Y. H., and van Wezel, G. P. (2019) Lugdunomycin, an angucycline-derived  
298 molecule with unprecedented chemical architecture, *Angew Chem Int Edit* 58, 2809-  
299 2814.
- 300 3. Grabley, S., Hammann, P., Hutter, K., Kluge, H., Thiericke, R., Wink, J., and Zeeck, A.  
301 (1991) Secondary metabolites by chemical-screening .19. Sm-196-a and Sm-196-B,  
302 novel biologically-active angucyclinones from *Streptomyces* Sp, *J Antibiot* 44, 670-673.
- 303 4. Rappsilber, J., Mann, M., and Ishihama, Y. (2007) Protocol for micro-purification,  
304 enrichment, pre-fractionation and storage of peptides for proteomics using StageTips,  
305 *Nat. Protoc.* 2, 1896-1906.
- 306 5. Distler, U., Kuharev, J., Navarro, P., Levin, Y., Schild, H., and Tenzer, S. (2014) Drift time-  
307 specific collision energies enable deep-coverage data-independent acquisition  
308 proteomics, *Nat. Methods* 11, 167-170.
- 309 6. Yanisch-Perron, C., Vieira, J., and Messing, J. (1985) Improved M13 phage cloning  
310 vectors and host strains: nucleotide sequences of the M13mp18 and pUC19 vectors,  
311 *Gene* 33, 103-119.
- 312 7. MacNeil, D. J., Occi, J. L., Gewain, K. M., MacNeil, T., Gibbons, P. H., Ruby, C. L., and  
313 Danis, S. J. (1992) Complex organization of the *Streptomyces avermitilis* genes  
314 encoding the avermectin polyketide synthase, *Gene* 115, 119-125.
- 315 8. Zhang, X., and Studier, F. W. (1997) Mechanism of inhibition of bacteriophage T7 RNA  
316 polymerase by T7 lysozyme, *J Mol Biol* 269, 10-27.



- 317 9. Murshudov, G. N., Vagin, A. A., and Dodson, E. J. (1997) Refinement of macromolecular  
318 structures by the maximum-likelihood method, *Acta Crystallogr D* 53, 240-255.
- 319 10. Davis, I. W., Leaver-Fay, A., Chen, V. B., Block, J. N., Kapral, G. J., Wang, X., Murray, L.  
320 W., Arendall, W. B., 3rd, Snoeyink, J., Richardson, J. S., and Richardson, D. C. (2007)  
321 MolProbity: all-atom contacts and structure validation for proteins and nucleic acids,  
322 *Nucleic Acids Res* 35, W375-383.
- 323 11. Shaaban, K. A., Srinivasan, S., Kumar, R., Damodaran, C., and Rohr, J. (2011)  
324 Landomycins P-W, cytotoxic angucyclines from *Streptomyces cyanogenus* S-136, *J Nat*  
325 *Prod* 74, 2-11.  
326  
327
